# Supplementary material for: Structural basis of unique ligand specificity of KAI2-like protein from parasitic weed Striga hermonthica
Source: PubMed Central journal article supplement (PMC4979206; doi:10.1038/srep31386), 2016-08-10
Supplement: srep31386-s1.pdf [file srep31386-s1.pdf]

**Supplementary Information for**

**Structural basis of unique ligand specificity of KAI2-like protein  
from parasitic weed *Striga hermonthica***

Yuqun Xu<sup>1</sup>, Takuya Miyakawa<sup>1</sup>, Hidemitsu Nakamura<sup>1</sup>, Akira Nakamura<sup>1</sup>, Yusaku  
Imamura<sup>1</sup>, Tadao Asami<sup>1,2,3</sup>, Masaru Tanokura<sup>1,\*</sup>

**Affiliations:**

<sup>1</sup> Department of Applied Biological Chemistry, Graduate School of Agricultural and Life  
Sciences, The University of Tokyo, 1-1-1 Yayoi, Bunkyo-ku, Tokyo 113-8657, Japan

<sup>2</sup> JST, CREST, 4-1-8 Honcho, Kawaguchi, Saitama 332-0012, Japan

<sup>3</sup> Department of Biochemistry, King Abdulaziz University, Jeddah 21589, Saudi Arabia

\*Corresponding author. Email: [amtanok@mail.ecc.u-tokyo.ac.jp](mailto:amtanok@mail.ecc.u-tokyo.ac.jp)

## Contents

**Supplementary Figure S1:** Phylogenetic tree of KAI2 and D14 family proteins.

**Supplementary Figure S2:** Multiple sequence alignment of KAI2/D14 proteins.

**Supplementary Figure S3:** Electron density of ShKAI2iB and its complex with KAR<sub>1</sub>.

**Supplementary Figure S4:** Results of ITC experiments between ShKAI2iB mutants and KAR<sub>1</sub>.

**Supplementary Figure S5:** Transcript level of *ShKAI2iB* during *Striga* seed conditioning.

**Supplementary Table 1:** Statistics of X-ray collection data and refinement.

**Supplementary Table 2:** Thermodynamic parameters determined by ITC.

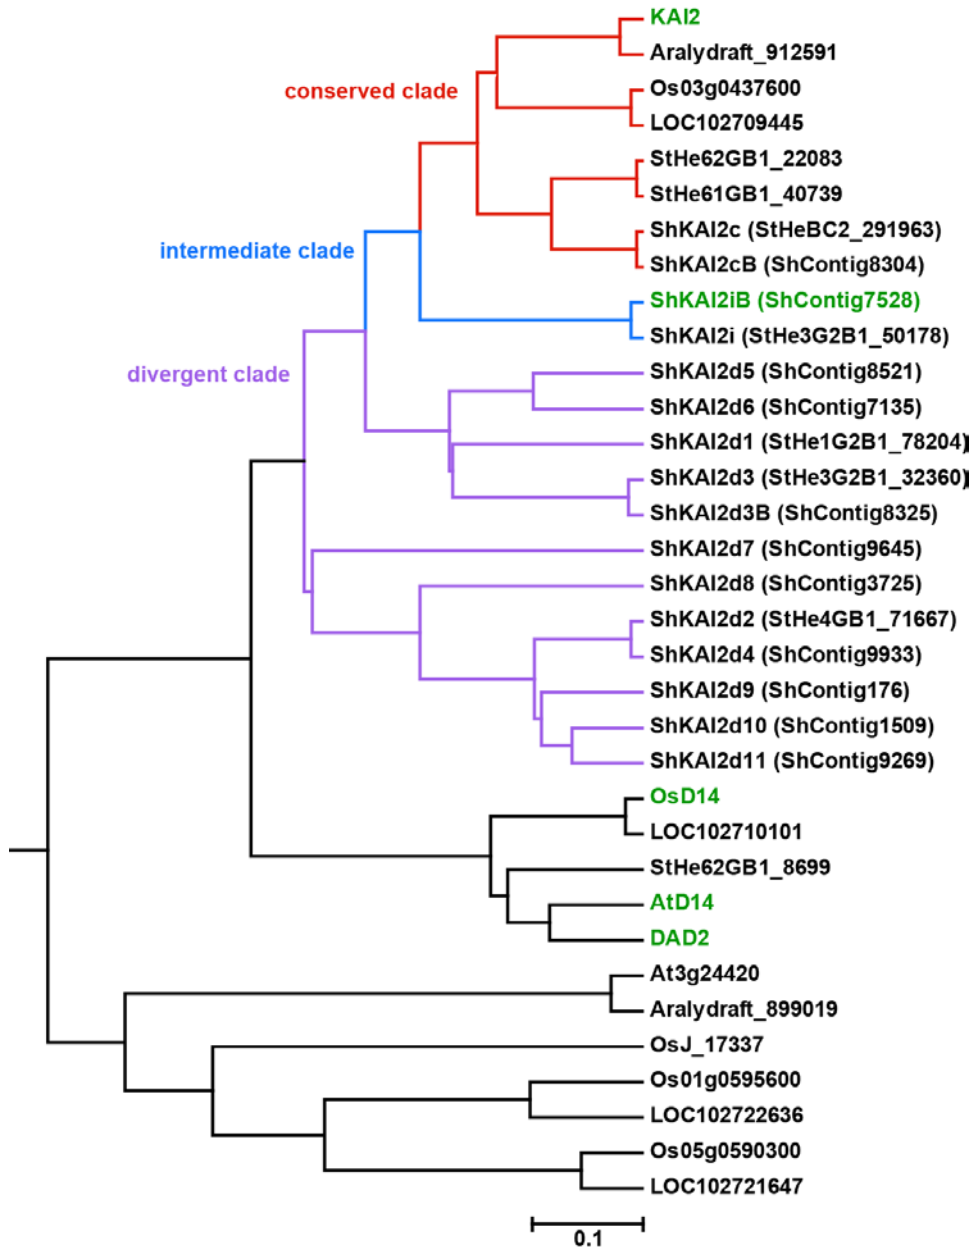

**Supplementary Figure 1 Phylogenetic tree of KAI2 and D14 family proteins.**

UPGMA phylogenetic tree was generated with amino acid sequences of D14 and D14L proteins among *Oryza* and *Arabidopsis*, *S. hermonthica* and that of *Petunia hybrida* DAD2. *Arabidopsis* KAI2 protein is able to bind both karrikin and SL and D14 is able to bind SL specifically. Branch length represents substitutions per site. Genes with accession numbers started with ShContig were quoted from *S. hermonthica* EST Database (<http://striga.psc.riken.jp/est2uni/>) and those started with StHe were from Parasitic Plant Genome Project (<http://ppgp.huck.psu.edu/>).

Different clades of KAI2 paralogues were divided according to a previous report<sup>18</sup>. Ancestral/conserved clade is most conserved to KAI2 phylogenetically but nonresponsive to karrikin and SL; diverse/fastest-evolving clade is corresponding to D14 being responsive to SL but not karrikin; while intermediate clade is responsive to karrikin but not SL.

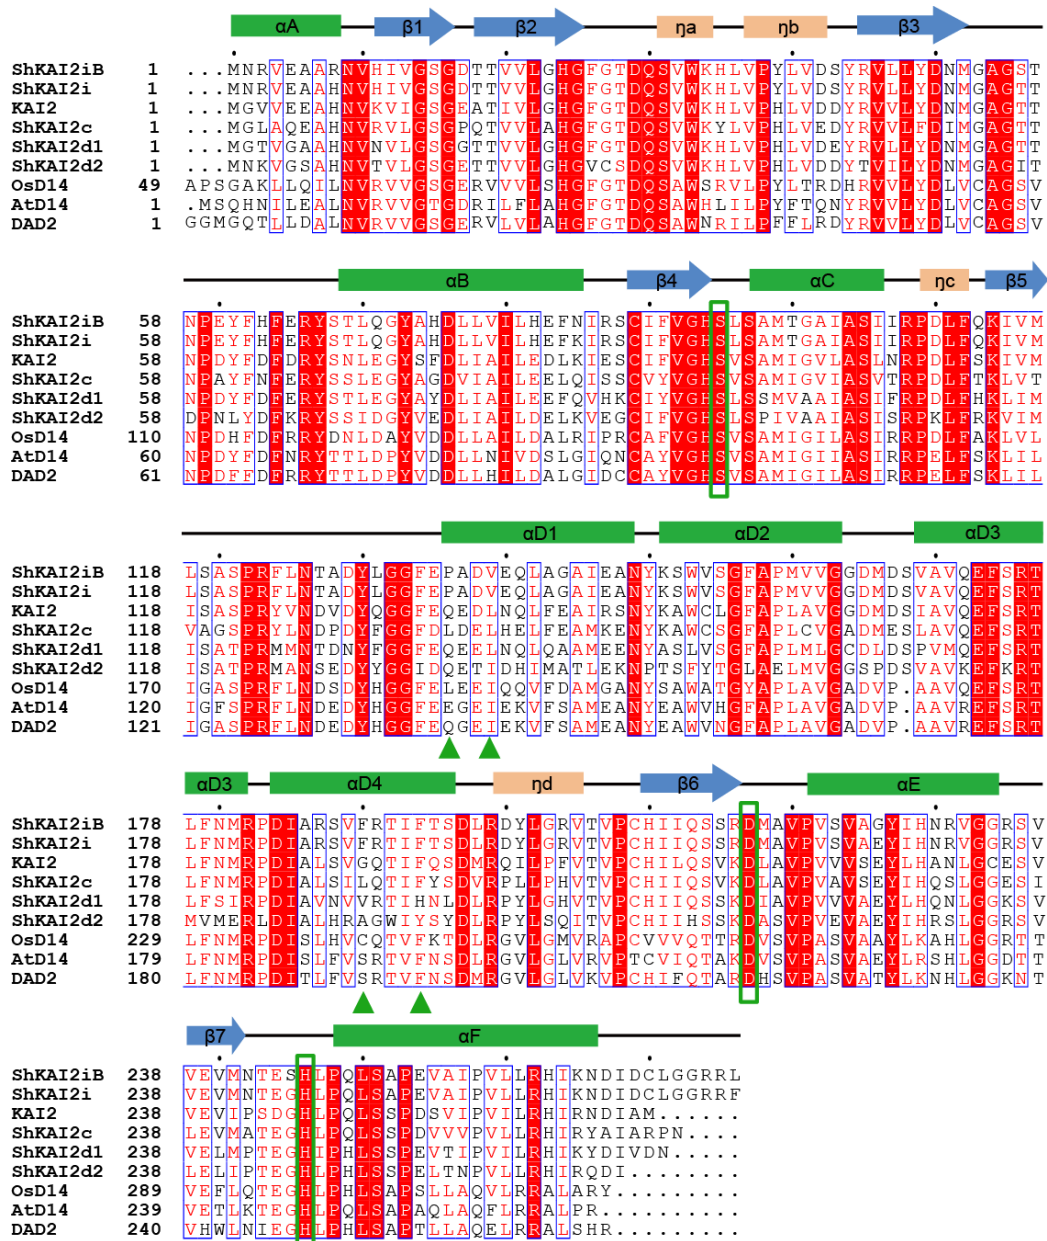

**Supplementary Figure 2. Multiple sequence alignment of KAI2/D14 proteins.**

Identical residues are shaded red, and homologous residues are shown as red letters. Green boxes represent catalytic triad residues. The secondary structure element of ShKAI2iB is shown at the top of the alignment ( $\alpha$ ,  $\alpha$ -helix;  $\eta$ ,  $3_{10}$ -helix; and  $\beta$ ,  $\beta$ -strand). Non-conserved residues (Val139, Pro136, and Phe190) of ShKAI2iB are highlighted with green triangles.

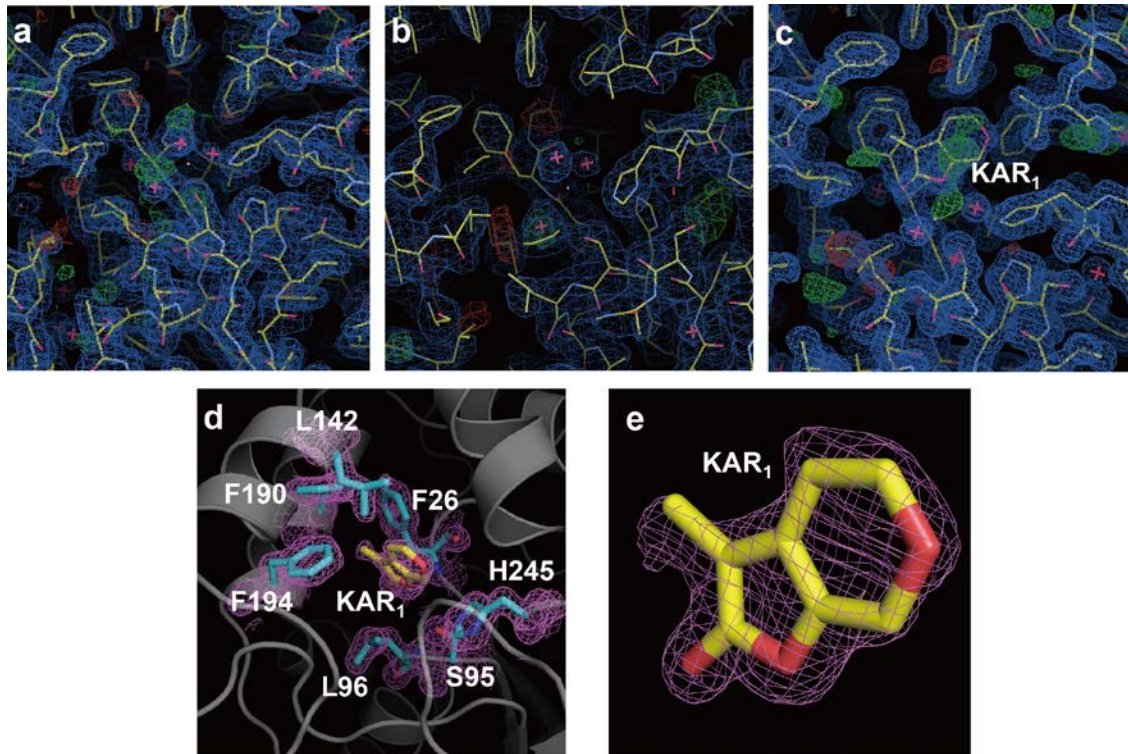

**Supplementary Figure 3. Electron density maps of ShKAI2iB and its complex with KAR<sub>1</sub>.** (a), (b), (c), Electron density maps for the ligand-binding cavity of apo-ShKAI2iB (a), ShKAI2iB-intermediate (b) and ShKAI2iB-KAR<sub>1</sub> complex (c) are shown. The mesh diagram represents  $F_o-F_c$  (green, +; red, -) at contour level of  $3.0\sigma$  and  $2F_o-F_c$  (blue) maps at contour level of  $1.0\sigma$ . (d)  $2F_o-F_c$  map ( $1.0\sigma$ ) around KAR<sub>1</sub> for the ShKAI2iB-KAR<sub>1</sub> complex structure. (e) The mesh diagram represents  $F_o-F_c$  omit map of KAR<sub>1</sub> contoured at level of  $3.0\sigma$  from ShKAI2iB-KAR<sub>1</sub> complex structure.

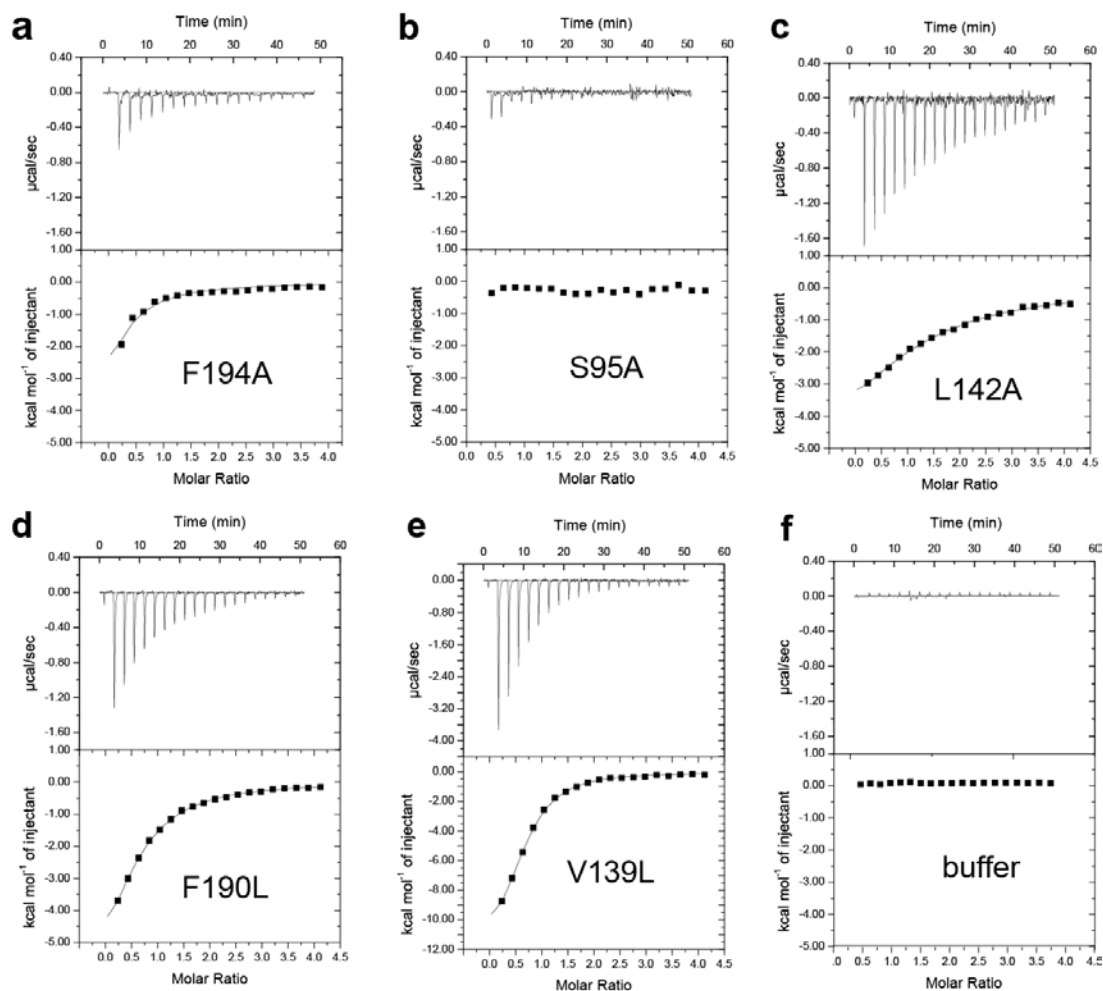

**Supplementary Figure 4. Results of ITC experiments between ShKAI2iB mutants and KAR<sub>1</sub>.** ITC experiments were performed by titrating KAR<sub>1</sub> into ShKAI2iB mutants (a, F194A; b, S95A; c, L142A; d, F190L; e, V139L) or into buffer as a negative control (f). The upper panel illustrates raw ITC data. The bottom panel represents data of the enthalpy change derived from the upper panel. Corresponding thermodynamic results are shown in Table S2.

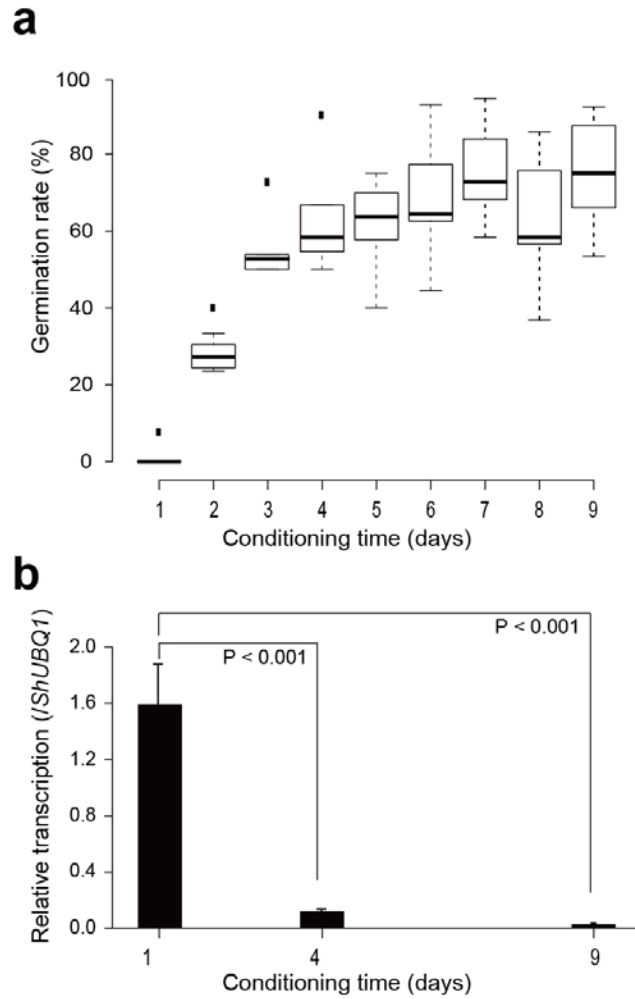

**Supplementary Figure 5. Transcript level of *ShKAI2iB* during *Striga* seed conditioning.** The *Striga* germination rate and the *ShKAI2iB* gene expression during the seed conditioning period. **(a)** Changes in the *Striga* seed germination rate during the seed conditioning period. *Striga* seeds were treated with 0.1  $\mu\text{M}$  of GR24. After further incubation at 30°C for 3 days, GR24-treated seeds were microscopically evaluated for germination. Center lines show the medians; box limits indicate the 25th and 75th percentiles as determined by R software; whiskers extend 1.5 times the interquartile range from the 25th and 75th percentiles, outliers are represented by dots.  $n = 5, 7, 5, 5, 7, 7, 7, 7, 7$  sample points. **(b)** Relative transcript levels of *ShKAI2iB* in *Striga* seeds conditioned for indicated days. The data means  $\pm$  SE of three samples. Student's t test was used to determine the significance of differences relative to the transcript level in *Striga* seeds conditioned for 1 day.



**Supplementary Table 1. Statistics of X-ray data collection and refinement.**

|                                                           | <b>ShKAI2iB</b>                      | <b>ShKAI2iB-I</b>                    | <b>KAR<sub>1</sub>-bound<br/>ShKAI2iB</b> |
|-----------------------------------------------------------|--------------------------------------|--------------------------------------|-------------------------------------------|
| <b>Data collection</b>                                    |                                      |                                      |                                           |
| Beamline                                                  | R-AXIS VII                           | PF AR-NW12A                          | PF AR-NW12A                               |
| Wavelength (Å)                                            | 1.5418                               | 1.0000                               | 1.0000                                    |
| Space group                                               | <i>P</i> <sub>6<sub>1</sub></sub> 22 | <i>P</i> <sub>6<sub>1</sub></sub> 22 | <i>P</i> <sub>6<sub>1</sub></sub> 22      |
| Unit-cell parameters (Å)                                  | 75.9, 75.9, 181.5                    | 76.0, 76.0, 180.0                    | 75.8, 75.8, 181.3                         |
| Resolution range (Å)                                      | 19.7–2.0                             | 24.9–2.6                             | 19.7–1.2                                  |
| No. of unique reflections                                 | 21039 (1469)                         | 9559 (475)                           | 96642 (4707)                              |
| Redundancy                                                | 18.7 (9.6)                           | 20.2 (20.9)                          | 20.6 (3.6)                                |
| Completeness (%)                                          | 99.6 (96.5)                          | 100.0 (99.9)                         | 99.9 (99.6)                               |
| <i>R</i> <sub>sym</sub>                                   | 0.063 (0.370)                        | 0.102 (0.626)                        | 0.065 (0.390)                             |
| <i>&lt;I/σ(I)&gt;</i>                                     | 36.2 (6.1)                           | 25.0 (5.9)                           | 97.8 (5.3)                                |
| <b>Refinement</b>                                         |                                      |                                      |                                           |
| No. reflections                                           | 19959                                | 9057                                 | 91454                                     |
| <i>R</i> <sub>factor</sub> / <i>R</i> <sub>free</sub> (%) | 18.0/22.5                            | 20.7/26.6                            | 14.1/15.5                                 |
| No. atoms                                                 |                                      |                                      |                                           |
| Protein                                                   | 2142                                 | 2103                                 | 2102                                      |
| Ligand                                                    | -                                    | -                                    | 11                                        |
| Water                                                     | 236                                  | 41                                   | 209                                       |
| <i>B</i> -factors (Å <sup>2</sup> )                       |                                      |                                      |                                           |
| Protein                                                   | 29.8                                 | 65.3                                 | 21.9                                      |
| Ligand                                                    | -                                    | -                                    | 21.9                                      |
| Water                                                     | 38.3                                 | 47.0                                 | 31.4                                      |
| R.m.s. deviations                                         |                                      |                                      |                                           |
| Bond lengths (Å)                                          | 0.009                                | 0.008                                | 0.011                                     |
| Bond angles (°)                                           | 1.310                                | 1.093                                | 1.694                                     |

\*Values in parentheses are for the highest-resolution shell.

**Supplementary Table 2. Thermodynamic parameters determined by ITC.**

| Mutant | $K_D$<br>( $\mu\text{M}$ ) | $\Delta H$<br>( $\text{kcal mol}^{-1}$ ) | $\Delta S$<br>( $\text{cal mol}^{-1} \text{deg}^{-1}$ ) | $\Delta G$<br>( $\text{kcal/mol}$ ) |
|--------|----------------------------|------------------------------------------|---------------------------------------------------------|-------------------------------------|
| WT     | $77.6 \pm 3.4$             | $-6.48 \pm 0.44$                         | -3.99                                                   | -5.35                               |
| V139L  | $35.6 \pm 7.0$             | $-12.87 \pm 0.03$                        | -24.8                                                   | -6.96                               |
| L142A  | $196 \pm 24$               | $-7.00 \pm 0.70$                         | -7.90                                                   | -4.76                               |
| F190L  | $187 \pm 43$               | $-11.71 \pm 8.89$                        | -24.6                                                   | -4.75                               |
| F194A  | $107 \pm 10$               | $-13.24 \pm 63.94$                       | -28.7                                                   | -5.11                               |
